# Supplementary material for: Diastereoselective synthesis of substituted diaziridines from simple ketones and aldehydes
Source: Royal Society of Chemistry journal article supplement (doi:10.1039/c5cc04813c), 2015-01-01

## Diastereoselective Synthesis of Substituted Diaziridines from Simple Ketones and Aldehydes

Alexander W. Beebe,<sup>§</sup> Emma F. Dohmeier,<sup>†</sup> and Gustavo Moura-Letts<sup>§\*</sup>

<sup>§</sup>*Department of Chemistry and Biochemistry, College of Science and Mathematics*

<sup>†</sup>*Department of Chemical Engineering, College of Engineering*

*Rowan University*

*201 Mullica Hill Rd, Glassboro, NJ, 08028*

### Supporting Information

|                                                             |     |
|-------------------------------------------------------------|-----|
| A. Materials and Methods                                    | S1  |
| B. Synthesis of diaziridines from <b>Table 2</b>            | S2  |
| C. Synthesis of diaziridines from <b>Table 3</b>            | S7  |
| D. <sup>1</sup> H-NMR, NOESY and <sup>13</sup> C-MR spectra | S9  |
| E. UPLC traces                                              | S26 |

## A. MATERIALS AND METHODS

Reagents were obtained from Aldrich Chemical ([www.sigma-aldrich.com](http://www.sigma-aldrich.com)), Acros Organics ([www.us.vwr.com](http://www.us.vwr.com)) or Alfa Aesar ([www.us.vwr.com](http://www.us.vwr.com)) and used without further purification. Solvents were obtained from EMD Miliphore DrySol ([www.us.vwr.com](http://www.us.vwr.com)) and degassed with N<sub>2</sub>. Solution phase reactions were performed in glass vials or round bottom flasks without inert atmosphere and magnetic stirring. Cold baths were generated as follows: 0 °C, wet ice/water; –10 °C, ice/acetone; –20 °C, dry ice/isopropanol monitored with a thermometer; –44 °C, dry ice/CH<sub>3</sub>CN; –63 °C, dry ice/chloroform; –78 °C, dry ice/acetone; –100 °C, dry ice/Et<sub>2</sub>O.

TLC was performed on 0.25 mm E. Merck silica gel 60 F254 plates and visualized under UV light (254 nm) or by staining with potassium permanganate (KMnO<sub>4</sub>), cerium ammonium molybdenate (CAM), phosphomolybdic acid (PMA), iodine (I<sub>2</sub>), or *p*-anisaldehyde. Silica flash chromatography was performed on E. Merck 230–400 mesh silica gel 60. Automated chromatography was performed on a ISOLERA Prime instrument with 10 g. SNAP silica gel normal phase cartridges using a flow rate of 12.0 mL/min and a gradient of 0–100% EtOAc in heptanes over 20 min with UV detection at 254 nm. UPLC was carried out on a Agilent 1100 UPLC with a Phenomenex 5 cm × 4.6 mm, 3 μm, 120 Å, C18 reverse phase column using a flow rate of 0.1 mL/min and a gradient of 80–95% CH<sub>3</sub>CN in 0.1% aq TFA over 5 min with UV detection at 254 nm. Analytical LC–MS was carried out on a Agilent 1100 UPLC System with Ion Trap MS Detector with a Phenomenex 5 cm × 4.6 mm, 3 μm, 120 Å, C18 reverse phase column using a flow rate of 0.1 mL/min and a gradient of 80–100% CH<sub>3</sub>CN in 0.1% aq TFA over 5 min with UV detection at 254 nm. NMR spectra were recorded on Varian Mercury II 400 MHz Spectrometer at 24 °C in CDCl<sub>3</sub> unless otherwise indicated. Chemical shifts are expressed in ppm relative to TMS (<sup>1</sup>H, 0 ppm) or solvent signals: CDCl<sub>3</sub> (<sup>1</sup>H, 7.23 ppm; <sup>13</sup>C, 77.0 ppm; coupling constants are expressed in Hz.

## B. REACTION SCOPE FOR ALDEHYDES AND KETONES:

**General method for the synthesis of *trans*-1,3-disubstituted-diaziridine.** In a 10 mL round bottom flask at 0 °C, aldehyde/ketone (1.0 mmol, 1.0 equiv) and amine (1.0 mmol, 1.0 equiv) were dissolved in 4 mL of CHCl<sub>3</sub>. At 0 °C, NaHCO<sub>3</sub> (1.5 mmol, 1.5 equiv) was added and the reaction was allowed to stir for 10 min. Then, HOSA (1 mmol, 1 equiv) was added in two portions, and the mixture was stirred until complete conversion had occurred as judged by TLC (approximately 6 h). The mixture was then cooled to 0 °C and quenched with satd aq NH<sub>4</sub>Cl. The mixture was extracted with EtOAc (3 × 25 mL), dried (Na<sub>2</sub>SO<sub>4</sub>), filtered, and concentrated by rotary evaporation to afford the crude product. Purification by automated silica gel flash chromatography (heptanes/EtOAc) yielded the corresponding *trans*-1,3-disubstituted-diaziridine.

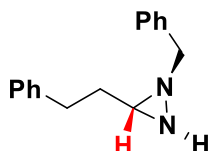

***trans*-1-Benzyl-3-phenethyldiaziridine (1a).** Purification by automated silica gel flash chromatography (10 g cartridge, 14 ml/min. 20:1 heptanes/EtOAc to 1:4 heptanes/EtOAc over 12 min) yielded the diaziridine **1a** (209 mg, 88%) as a light yellow oil. **TLC:**  $R_f$  0.48 (1:1 heptanes/EtOAc). **UPLC:**  $t_{ret}$  = 0.92 min. **<sup>1</sup>H-NMR** (400 MHz, CDCl<sub>3</sub>):  $\delta$  7.40–7.05 (m, 9H), 3.63 (d,  $J$  = 7 Hz, 1H), 3.35 (d,  $J$  = 7 Hz, 1H), 2.67 (dd,  $J$  = 16.8, 5.9 Hz, 2H), 2.59–2.57 (m, 1H), 1.89–1.83 (m, 2H), 1.79 (bs, 1H). **<sup>13</sup>C-NMR** (125 MHz, CDCl<sub>3</sub>):  $\delta$  140.6, 137.6, 128.5 (2C), 128.3 (2C), 128.2 (2C), 128.1 (2C), 127.2, 125.9, 64.5, 59.3, 36.0, 31.9 ppm. **ESI-MS**  $m/z$  (rel int): (pos) 239.2 ([M+H]<sup>+</sup>, 100); (neg) 237.2 ([M-H]<sup>-</sup>, 100).

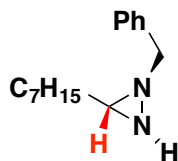

***trans*-1-benzyl-3-heptyldiaziridine (2).** Purification by automated silica gel flash chromatography (10 g cartridge, 14 ml/min. 20:1 heptanes/EtOAc to 1:4 heptanes/EtOAc over 12 min) yielded the diaziridine **2** (195 mg, 89%) as a colorless oil. **TLC:**  $R_f$  0.64 (1:1 heptanes/EtOAc). **UPLC:**  $t_{ret}$  = 1.15 min. **<sup>1</sup>H-NMR** (400 MHz, CDCl<sub>3</sub>):  $\delta$  7.35–7.21 (m, 5H), 3.52 (d,  $J$  = 7 Hz, 1H), 3.43 (d,  $J$  = 7 Hz, 1H), 2.59–2.56 (m, 1H), 1.69 (bs, 1H), 1.50–1.40 (m, 2H), 1.29–1.25 (m, 2H), 1.24–1.19 (m, 8H), 0.75 (t,  $J$  = 7.5 Hz, 3H). **<sup>13</sup>C-NMR** (125 MHz, CDCl<sub>3</sub>):  $\delta$  137.7, 128.6 (2C), 128.3 (2C), 127.3, 64.6, 59.8, 34.6, 31.3, 29.2, 28.5, 25.9, 22.6, 13.8 ppm. **ESI-MS**  $m/z$  (rel int): (pos) 233.2 ([M+H]<sup>+</sup>, 100); (neg) 231.2 ([M-H]<sup>-</sup>, 100).

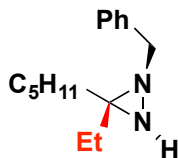

**trans-1-benzyl-3-hexyl-3-methyldiaziridine (3).** Purification by automated silica gel flash chromatography (10 g cartridge, 14 ml/min. 20:1 heptanes/EtOAc to 1:4 heptanes/EtOAc over 12 min) yielded the diaziridine **3** (183 mg, 84%). **TLC:**  $R_f$  0.62 (1:1 heptanes/EtOAc). **UPLC:**  $t_{ret}$  major = 1.25 min,  $t_{ret}$  minor = 1.18 min.  **$^1\text{H-NMR}$**  (400 MHz, minor isomer resonances are underlined,  $\text{CDCl}_3$ ):  $\delta$  7.38–7.22 (m, 5H), 3.74 (dd,  $J = 13.7, 7.5$  Hz, 1H), 3.65 (dd,  $J = 13.7, 5.9$  Hz, 1H), 1.98 (s, 0.66H), 1.95 (s, 0.33H), 1.78–1.58 (m, 3H), 1.49–1.40 (m, 2H), 1.38–1.20 (m, 5H), 1.16 (t,  $J = 7.3$  Hz, 1.1 H), 0.93–0.82 (m, 4.9H).  **$^{13}\text{C-NMR}$**  (125 MHz,  $\text{CDCl}_3$ ):  $\delta$  139.1, 128.4 (2C), 128.2 (2C), 126.9, 64.4, 56.9, 56.8, 37.9, 32.2, 31.9, 31.2, 28.2, 25.3, 24.5, 22.6, 21.6, 14.0, 9.9, 9.0 ppm. **ESI-MS**  $m/z$  (rel int): (pos) 233.3 ( $[\text{M}+\text{H}]^+$ , 100); (neg) 231.3 ( $[\text{M}-\text{H}]^-$ , 100).

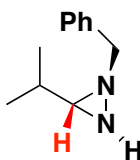

**trans-1-benzyl-3-isopropylidiaziridine (4).** Purification by automated silica gel flash chromatography (10 g cartridge, 14 ml/min. 20:1 heptanes/EtOAc to 1:4 heptanes/EtOAc over 12 min) yielded the diaziridine **4** (132 mg, 80%) as light yellow oil. **TLC:**  $R_f$  0.57 (1:1 heptanes/EtOAc). **UPLC:**  $t_{ret} = 1.00$  min.  **$^1\text{H-NMR}$**  (400 MHz,  $\text{CDCl}_3$ ):  $\delta$  7.45–7.25 (m, 5H), 3.66 (d,  $J = 7$  Hz, 1H), 3.44 (d,  $J = 7$  Hz, 1H), 2.44 (d,  $J = 8$  Hz, 1H), 1.82 (bs, 1H), 1.33 (septet,  $J = 7.5$  Hz, 2H), 0.98 (d,  $J = 7.5$  Hz, 3H), 0.95 (d,  $J = 7.5$  Hz, 3H).  **$^{13}\text{C-NMR}$**  (125 MHz,  $\text{CDCl}_3$ ):  $\delta$  137.7, 129.1 (2C), 128.6 (2C), 127.3, 65.9, 65.1, 33.1, 18.8, 18.1 ppm. **ESI-MS**  $m/z$  (rel int): (pos) 177.3 ( $[\text{M}+\text{H}]^+$ , 100); (neg) 175.3 ( $[\text{M}-\text{H}]^-$ , 100).

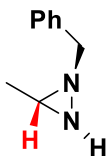

**trans-1-benzyl-3-methyldiaziridine (5).** Purification by automated silica gel flash chromatography (10 g cartridge, 14 ml/min. 20:1 heptanes/EtOAc to 1:4 heptanes/EtOAc over 12 min) yielded the diaziridine **5** (118 mg, 85%) as a colorless oil. **TLC:**  $R_f$  0.53 (1:1 heptanes/EtOAc). **UPLC:**  $t_{ret} = 1.06$  min.  **$^1\text{H-NMR}$**  (400 MHz,  $\text{CDCl}_3$ ):  $\delta$  7.42–7.24 (m, 5H), 3.59 (d,  $J = 6.9$  Hz, 1H), 3.52 (d,  $J = 6.9$  Hz, 1H), 3.59 (d,  $J = 6.9$  Hz, 1H), 2.71 (dq,  $J = 7.3, 4.9$  Hz, 1H), 1.66 (bs, 1H), 1.38 (d,  $J = 4.9$  Hz, 3H).  **$^{13}\text{C-NMR}$**  (100 MHz,  $\text{CDCl}_3$ ):  $\delta$  138.2, 128.7 (2C), 128.4 (2C), 127.5, 64.8, 56.2, 20.3 ppm. **ESI-MS**  $m/z$  (rel int): (pos) 149.2 ( $[\text{M}+\text{H}]^+$ , 100); (neg) 147.2 ( $[\text{M}-\text{H}]^-$ , 100).

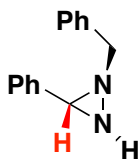

**trans-1-benzyl-3-phenyldiaziridine (6).** Purification by automated silica gel flash chromatography (10 g cartridge, 14 ml/min. 20:1 heptanes/EtOAc to 1:4 heptanes/EtOAc over 12 min) yielded the diaziridine **6** (172 mg, 87%) as a light yellow oil. **TLC:**  $R_f$  0.51 (1:1 heptanes/EtOAc). **UPLC:**  $t_{ret} = 1.03$  min.  **$^1\text{H-NMR}$**  (400 MHz,  $\text{CDCl}_3$ ):  $\delta$  7.54–7.25 (m, 10H), 3.82 (d,  $J = 7.1$  Hz, 1H), 3.74 (d,  $J = 7.1$  Hz, 1H), 3.59 (d,  $J = 3.5$  Hz, 1H), 2.09 (d,  $J = 3.1$  Hz, 1H).  **$^{13}\text{C-NMR}$**  (100 MHz,  $\text{CDCl}_3$ ):  $\delta$  137.6, 137.5, 129.9 (2C), 128.8 (2C), 128.7 (2C), 127.3 (2C), 127.0, 126.3, 64.7, 60.0 ppm. **ESI-MS**  $m/z$  (rel int): (pos) 211.2 ( $[\text{M}+\text{H}]^+$ , 100); (neg) 209.2 ( $[\text{M}-\text{H}]^-$ , 100).

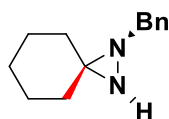

**1-benzyl-1,2-diazaspiro[2.5]octane (7).** Purification by automated silica gel flash chromatography (10 g cartridge, 14 ml/min. 20:1 heptanes/EtOAc to 1:4 heptanes/EtOAc over 12 min) yielded the diaziridine **7** (181 mg, 91%) as a colorless oil. **TLC:**  $R_f$  0.60 (1:1 heptanes/EtOAc). **UPLC:**  $t_{ret} = 1.12$  min.  **$^1\text{H-NMR}$**  (400 MHz,  $\text{CDCl}_3$ ):  $\delta$  7.41–7.22 (m, 5H), 3.78 (d,  $J = 13.8$  Hz, 1H), 3.69 (d,  $J = 13.8$  Hz, 1H), 2.01 (s, 1H), 1.85–1.72 (m, 2H), 1.72–1.56 (m, 5H), 1.56–1.41 (m, 3H).  **$^{13}\text{C-NMR}$**  (100 MHz,  $\text{CDCl}_3$ ):  $\delta$  139.3, 128.6 (2C), 128.5 (2C), 127.1, 62.0, 56.6, 39.4, 28.5, 25.7, 25.3, 25.2 ppm. **ESI-MS**  $m/z$  (rel int): (pos) 211.2 ( $[\text{M}+\text{H}]^+$ , 100); (neg) 209.2 ( $[\text{M}-\text{H}]^-$ , 100).

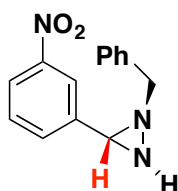

**trans-1-benzyl-3-(3-nitrophenyl)diaziridine (8).** Purification by automated silica gel flash chromatography (10 g cartridge, 14 ml/min. 20:1 heptanes/EtOAc to 1:4 heptanes/EtOAc over 12 min) yielded the diaziridine **8** (187 mg, 78%) as a colorless oil. **TLC:**  $R_f$  0.48 (1:1 heptanes/EtOAc). **UPLC:**  $t_{ret} = 1.10$  min.  **$^1\text{H-NMR}$**  (400 MHz,  $\text{CDCl}_3$ ):  $\delta$  8.28–8.22 (m, 1H), 8.16–8.09 (m, 1H), 7.72–7.68 (m, 1H), 7.53–7.49 (m, 1H), 7.38–7.33 (m, 4H), 7.29–7.24 (m, 1H), 4.82 (s, 1H), 3.92 (d,  $J = 2.4$  Hz, 1H), 3.83 (d,  $J = 2.2$  Hz, 1H), 1.76 (bs, 1H).  **$^{13}\text{C-NMR}$**  (100 MHz,  $\text{CDCl}_3$ ):  $\delta$  142.8, 139.9, 134.4, 129.6 (2C), 129.4 (2C), 128.7 (2C), 128.4 (2C), 123.3, 122.2, 53.5, 52.4 ppm. **ESI-MS**  $m/z$  (rel int): (pos) 256.2 ( $[\text{M}+\text{H}]^+$ , 100); (neg) 254.2 ( $[\text{M}-\text{H}]^-$ , 100).

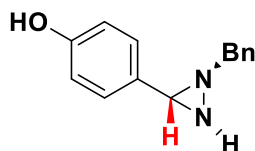

**trans-4-(1-benzylidiaziridin-3-yl)phenol (9).** Purification by automated silica gel flash chromatography (10 g cartridge, 14 ml/min. 20:1 heptanes/EtOAc to 1:4 heptanes/EtOAc over 12 min) yielded the diaziridine **9** (170 mg, 80%) as a yellow oil. **TLC:**  $R_f$  0.35 (1:1 heptanes/EtOAc). **UPLC:**  $t_{ret}$  = 1.08 min.  **$^1\text{H-NMR}$**  (400 MHz,  $\text{CDCl}_3$ ):  $\delta$  8.59 (bs, 1H), 8.07 (s, 1H), 7.43–7.21 (m, 6H), 7.12–7.07 (m, 3H), 6.88 (d,  $J$  = 7.1 Hz, 1H), 3.82 (d,  $J$  = 8.4 Hz, 1H), 3.76 (d,  $J$  = 8.2 Hz, 1H), 3.57 (d,  $J$  = 2.6 Hz, 1H), 2.19 (bs, 1H).  **$^{13}\text{C-NMR}$**  (100 MHz,  $\text{CDCl}_3$ ):  $\delta$  137.6, 137.5, 129.9 (2C), 128.8 (2C), 128.7 (2C), 127.3 (2C), 127.0, 126.3, 64.7, 60.0 ppm. **ESI-MS**  $m/z$  (rel int): (pos) 227.2 ( $[\text{M}+\text{H}]^+$ , 100); (neg) 225.2 ( $[\text{M}-\text{H}]^-$ , 100).

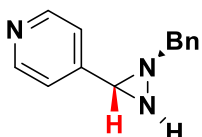

**trans-4-(1-benzylidiaziridin-3-yl)pyridine (10).** Purification by automated silica gel flash chromatography (10 g cartridge, 14 ml/min. 20:1 heptanes/EtOAc to 1:4 heptanes/EtOAc over 12 min) yielded the diaziridine **10** (169 mg, 85%) as a colorless oil. **TLC:**  $R_f$  0.32 (1:1 heptanes/EtOAc). **UPLC:**  $t_{ret}$  = 0.95 min.  **$^1\text{H-NMR}$**  (400 MHz,  $\text{CDCl}_3$ ):  $\delta$  8.55–8.51 (m, 2H), 7.44–7.23 (m, 7H), 3.78 (d,  $J$  = 7.1 Hz, 1H), 3.68 (d,  $J$  = 7.1 Hz, 1H), 3.48 (d,  $J$  = 2.2 Hz, 1H), 2.22 (d,  $J$  = 2.4 Hz, 1H).  **$^{13}\text{C-NMR}$**  (125 MHz,  $\text{CDCl}_3$ ):  $\delta$  149.9, 146.2, 137.0, 128.1 (2C), 128.0 (2C), 127.3, 121.1, 64.3, 58.2 ppm. **ESI-MS**  $m/z$  (rel int): (pos) 212.1 ( $[\text{M}+\text{H}]^+$ , 100); (neg) 210.2 ( $[\text{M}-\text{H}]^-$ , 100).

**C. REACTION SCOPE FOR AMINES:**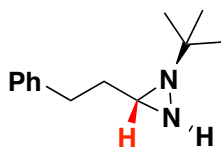

**trans-1-(tert-butyl)-3-phenethylidiaziridine (11).** Purification by automated silica gel flash chromatography (10 g cartridge, 14 ml/min. 20:1 heptanes/EtOAc to 1:4 heptanes/EtOAc over 12 min) yielded the diaziridine **11** (171 mg, 89%) as a colorless oil. **TLC:**  $R_f$  0.31 (1:1 hexanes/EtOAc). **UPLC:**  $t_{ret}$  = 0.91 min.  **$^1\text{H-NMR}$**  (400 MHz,  $\text{CDCl}_3$ ):  $\delta$  7.31–7.19 (m, 5H), 2.92–2.59 (m, 3H), 1.95 (ddd,  $J$  = 8.5, 4.3, 1.6 Hz, 1H), 1.73 (td,  $J$  = 6.7, 2.9 Hz, 1H), 1.39 (d,  $J$  = 7.3 Hz, 1H), 4.01 (s, 9H).  **$^{13}\text{C-NMR}$**  (100 MHz,  $\text{CDCl}_3$ ):  $\delta$  140.9, 128.4 (2C), 128.1 (2C), 125.6, 54.8, 52.5, 36.8, 32.4, 25.7 (3C) ppm. **ESI-MS**  $m/z$  (rel int): (pos) 205.1 ( $[\text{M}+\text{H}]^+$ , 100); (neg) 203.1 ( $[\text{M}-\text{H}]^-$ , 100).

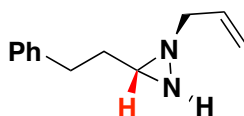

**trans-1-allyl-3-phenethylidiaziridine (12).** Purification by automated silica gel flash chromatography (10 g cartridge, 14 ml/min. 20:1 heptanes/EtOAc to 1:4 heptanes/EtOAc over 12 min) yielded the diaziridine **12** (138 mg, 78%) as a colorless oil. **TLC:**  $R_f$  0.31 (1:1 hexanes/EtOAc). **UPLC:**  $t_{ret}$  = 0.98 min.  **$^1\text{H-NMR}$**  (400 MHz,  $\text{CDCl}_3$ ):  $\delta$  7.32–7.20 (m, 5H), 5.88 (dddd,  $J$  = 16, 10, 8, 6.5 Hz, 1H), 5.25 (d,  $J$  = 16 Hz), 5.21 (d,  $J$  = 10 Hz), 3.00 (td,  $J$  = 6.2, 5.3 Hz, 2H), 3.00 (dt,  $J$  = 6.2, 1.3 Hz, 2H), 2.81 (t,  $J$  = 7.3 Hz, 2H), 2.54 (dd,  $J$  = 7.2, 5.4 Hz, 1H), 1.88 (td,  $J$  = 7.6, 5.4 Hz, 2H), 1.67 (d,  $J$  = 7.3 Hz, 1H).  **$^{13}\text{C-NMR}$**  (100 MHz,  $\text{CDCl}_3$ ):  $\delta$  140.7, 133.8, 128.4 (2C), 128.2 (2C), 126.1, 117.4, 63.2, 59.3, 36.2, 32.1 ppm. **ESI-MS**  $m/z$  (rel int): (pos) 189.1 ( $[\text{M}+\text{H}]^+$ , 100); (neg) 187.1 ( $[\text{M}-\text{H}]^-$ , 100).

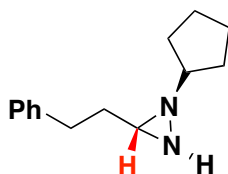

**trans-1-cyclopentyl-3-phenethylidiaziridine (13).** Purification by automated silica gel flash chromatography (10 g cartridge, 14 ml/min. 20:1 heptanes/EtOAc to 1:4 heptanes/EtOAc over 12 min) yielded the diaziridine **13** (154 mg, 76%) as a colorless oil. **TLC:**  $R_f$  0.31 (1:1 hexanes/EtOAc). **UPLC:**  $t_{ret}$  = 0.93 min.  **$^1\text{H-NMR}$**  (400 MHz,  $\text{CDCl}_3$ ):  $\delta$  7.40–7.12 (m, 5H), 2.81 (dt,  $J$  = 7.1, 6.7 Hz, 2H), 2.58–2.43 (m, 1H), 2.16 (d,  $J$  = 6.3 Hz, 1H), 1.92 (dt,  $J$  = 9.0, 6.8 Hz, 1H), 1.87–1.84 (m, 6H), 1.62–1.39 (m, 3H).  **$^{13}\text{C-NMR}$**  (100 MHz,  $\text{CDCl}_3$ ):  $\delta$  140.7, 128.4 (2C), 128.2 (2C), 126.0, 71.0, 59.2, 36.2, 32.3, 32.1, 30.6, 24.7, 24.4 ppm. **ESI-MS**  $m/z$  (rel int): (pos) 217.1 ( $[\text{M}+\text{H}]^+$ , 100); (neg) 215.1 ( $[\text{M}-\text{H}]^-$ , 100).

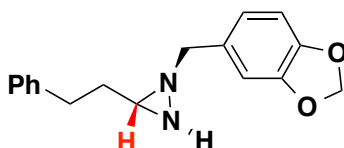

**trans-1-(benzo[d][1,3]dioxol-5-ylmethyl)-3-phenethylidiaziridine (14).** Purification by automated silica gel flash chromatography (10 g cartridge, 14 ml/min. 20:1 heptanes/EtOAc to 1:4 heptanes/EtOAc over 12 min) yielded the diaziridine **14** (226 mg, 85%) as a colorless oil. **TLC:**  $R_f$  0.31 (1:1 hexanes/EtOAc). **UPLC:**  $t_{ret}$  = 1.29 min.  **$^1\text{H-NMR}$**  (400 MHz,  $\text{CDCl}_3$ ):  $\delta$  7.37–7.06 (m, 5H), 6.87 (s, 1H), 6.76 (d,  $J$  = 7.3 Hz, 2H), 5.90 (s, 2H), 3.39 (s, 2H), 2.71 (t,  $J$  = 7.7 Hz, 1H), 2.60 (bs, 1H), 1.99–1.66 (m, 4H).  **$^{13}\text{C-NMR}$**  (100 MHz,  $\text{CDCl}_3$ ):  $\delta$  147.4, 140.7, 140.6, 131.4, 128.3 (2C), 128.2 (2C), 126.0, 121.8, 109.1, 108.0, 100.7, 64.3, 59.2, 36.0, 31.9 ppm. **ESI-MS**  $m/z$  (rel int): (pos) 283.1 ( $[\text{M}+\text{H}]^+$ , 100); (neg) 281.0 ( $[\text{M}-\text{H}]^-$ , 100).

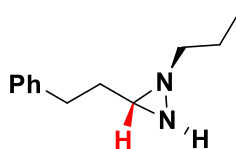

**trans-3-phenethyl-1-propyldiaziridine (15).** Purification by automated silica gel flash chromatography (10 g cartridge, 14 ml/min. 20:1 heptanes/EtOAc to 1:4 heptanes/EtOAc over 12 min) yielded the diaziridine **15** (170 mg, 94%) as a colorless oil. **TLC:**  $R_f$  0.31 (1:1 hexanes/EtOAc). **UPLC:**  $t_{ret}$  = 1.01 min.  **$^1\text{H-NMR}$**  (400 MHz,  $\text{CDCl}_3$ ):  $\delta$  7.26–7.15 (m, 5H), 2.75 (td,  $J$  = 7.5, 4.9 Hz, 2H), 2.42 (q,  $J$  = 6.0 Hz, 1H), 2.38 – 2.29 (m, 1H), 2.30 – 2.17 (m, 1H), 1.88 – 1.72 (m, 2H), 1.64 – 1.50 (m, 3H), 0.91 (t,  $J$  = 7.4 Hz, 3H).  **$^{13}\text{C-NMR}$**  (100 MHz,  $\text{CDCl}_3$ ):  $\delta$  140.5, 128.2 (2C), 128.0 (2C), 125.8, 62.5, 59.2, 36.0, 31.9, 21.5, 11.6 ppm. **ESI-MS**  $m/z$  (rel int): (pos) 191.1 ( $[\text{M}+\text{H}]^+$ , 100); (neg) 189.1 ( $[\text{M}-\text{H}]^-$ , 100).

---



PROTON  
HB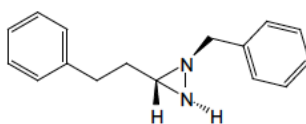

1a

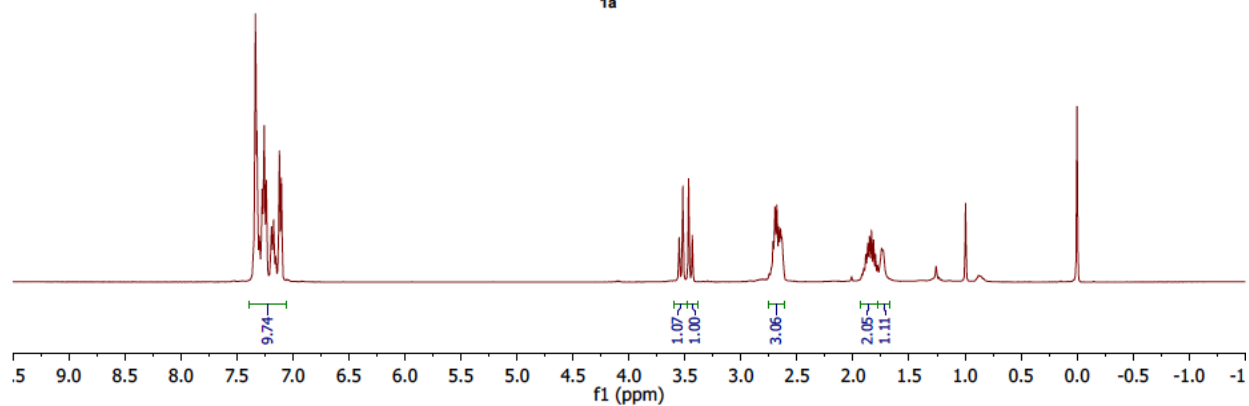CARBON  
AWB-2014-45-HB-C13-1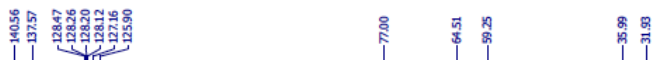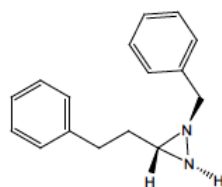

1a

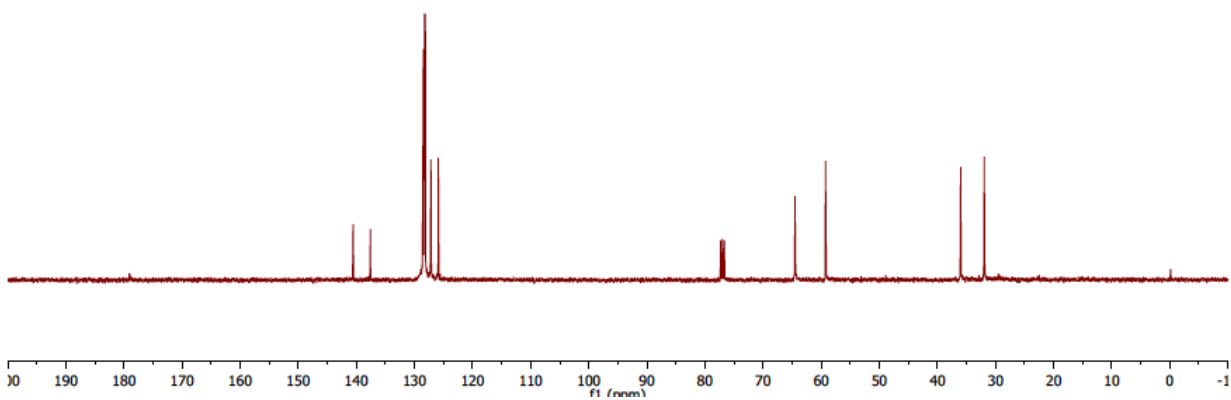

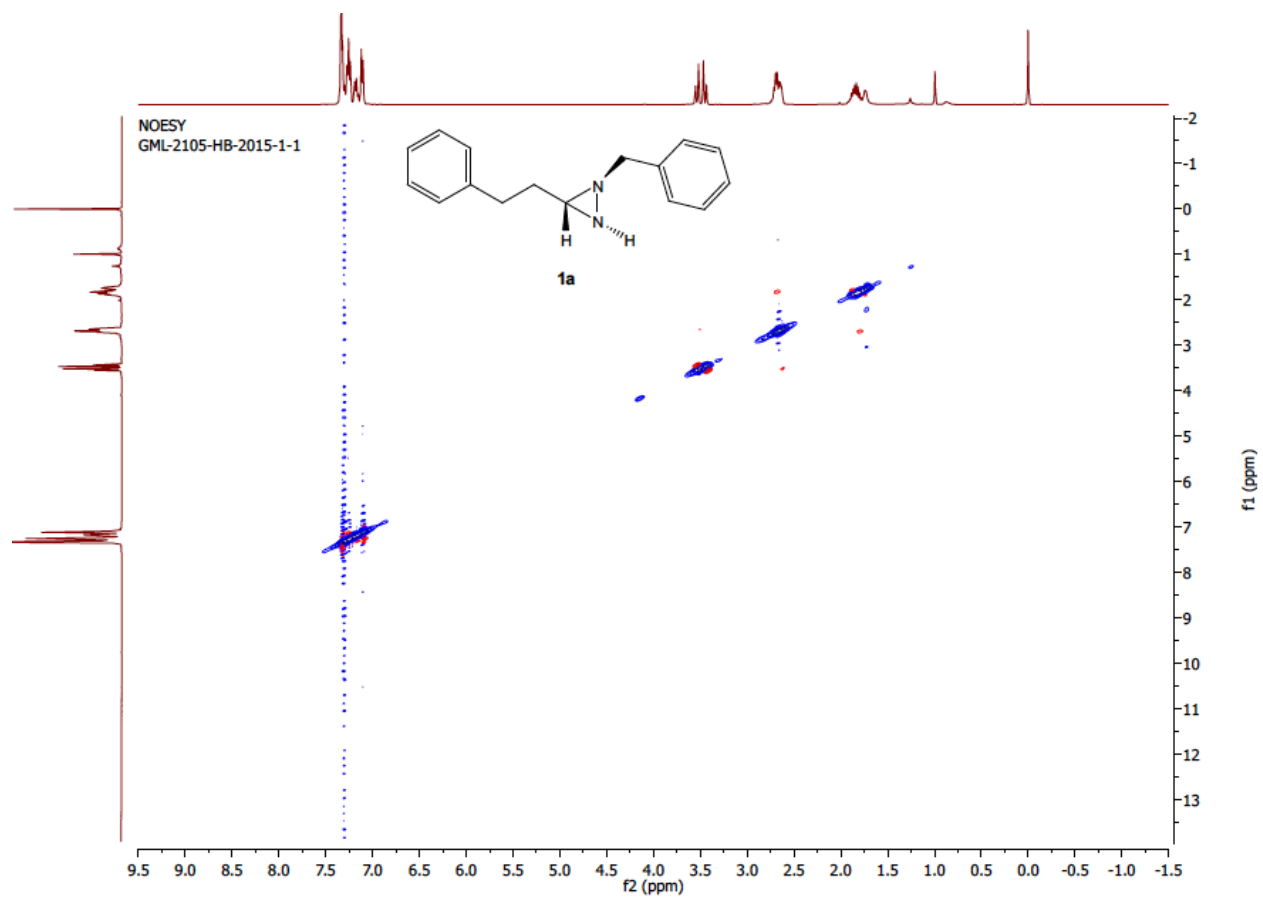

PROTON  
SR-2014-43-OB-1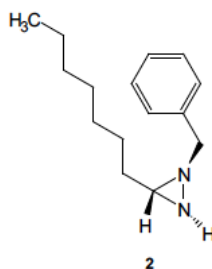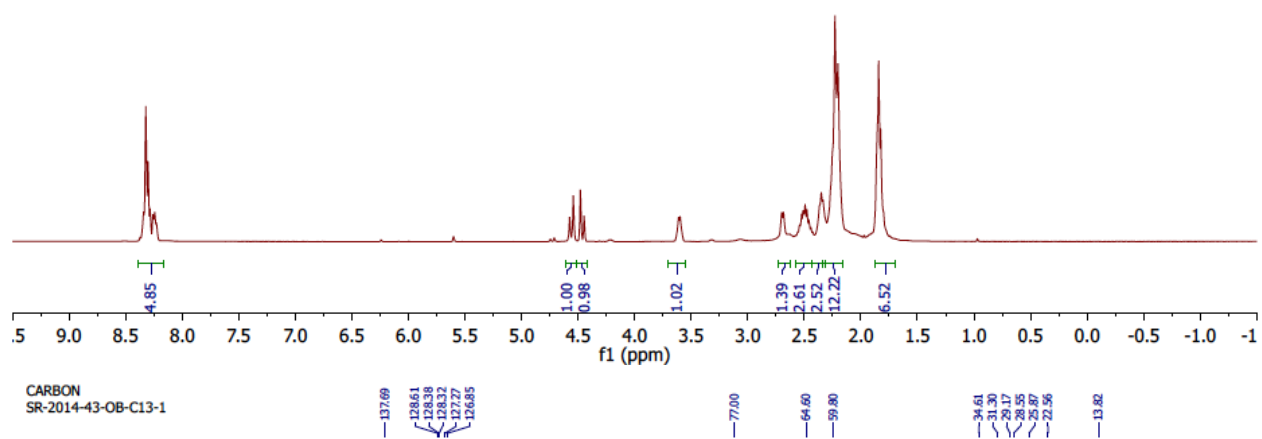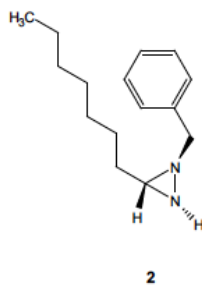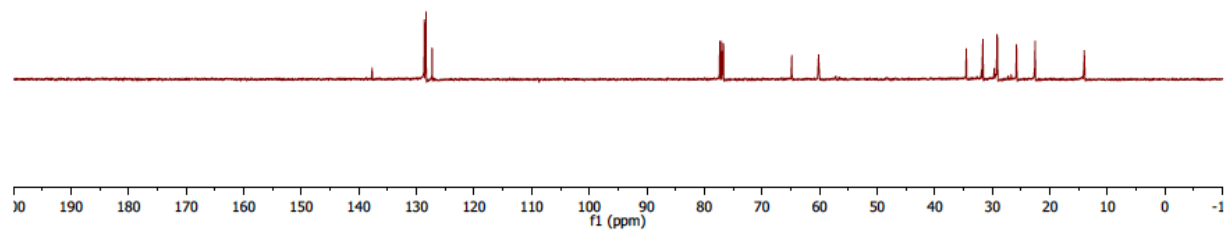

PROTON  
GML-2015-EB-1616-1

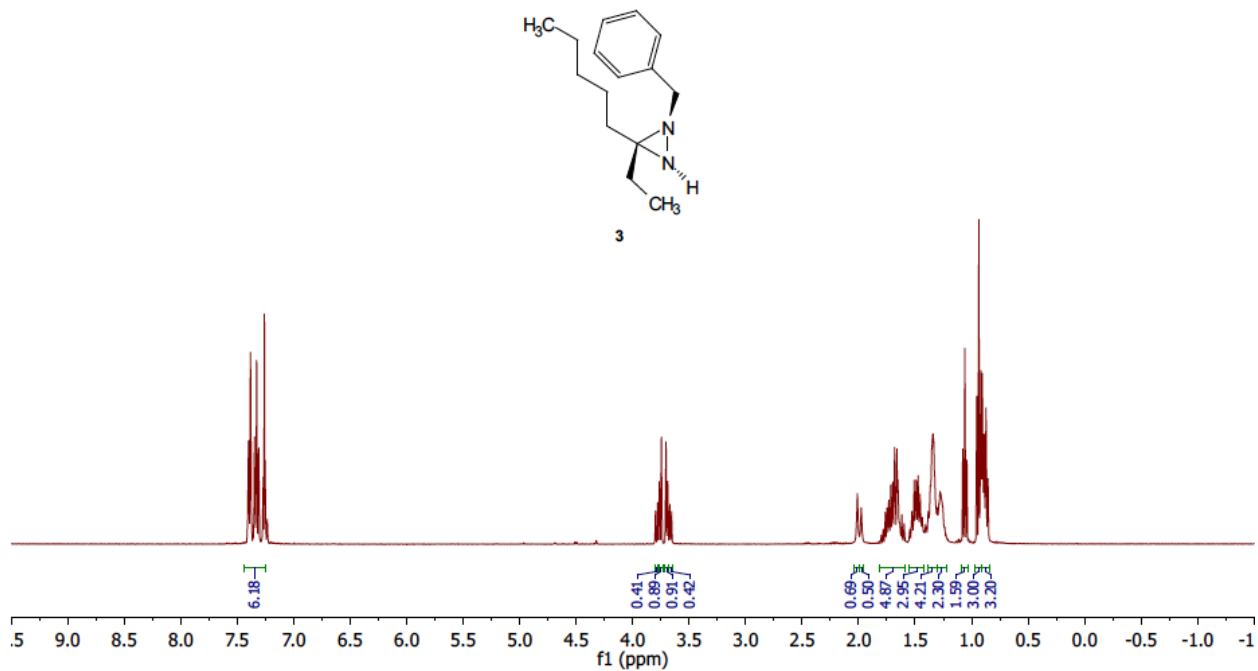

CARBON  
GML-2015-EB-16-C13

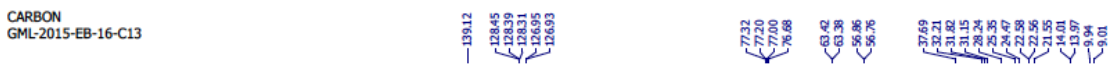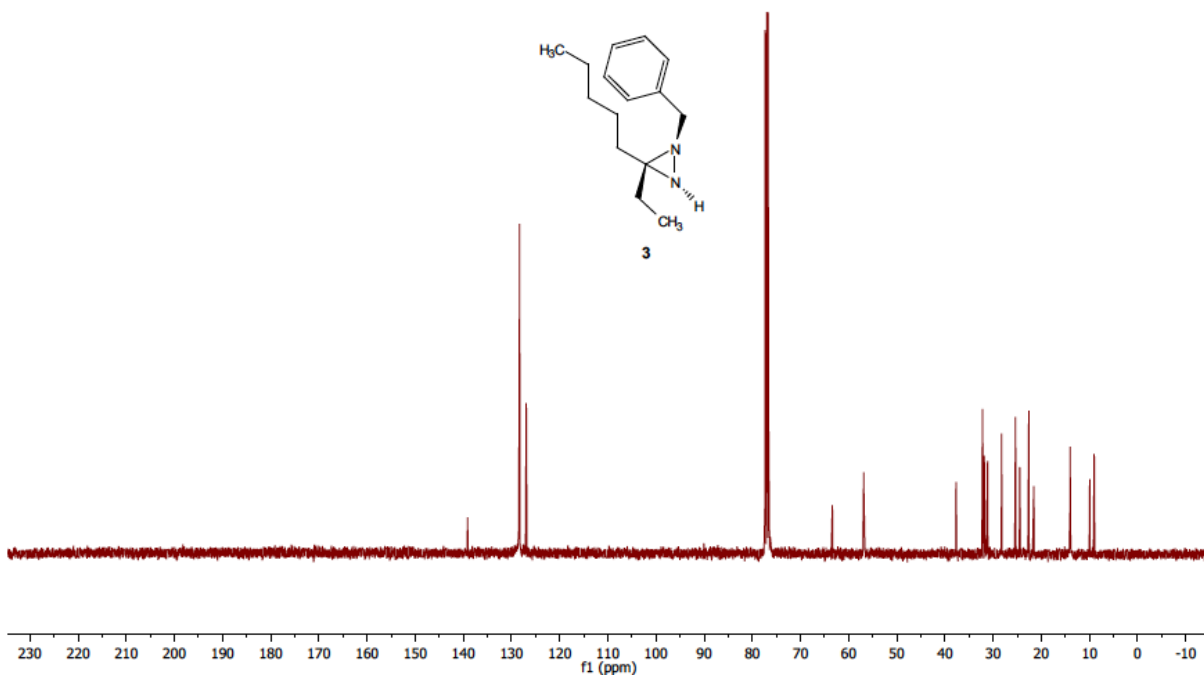

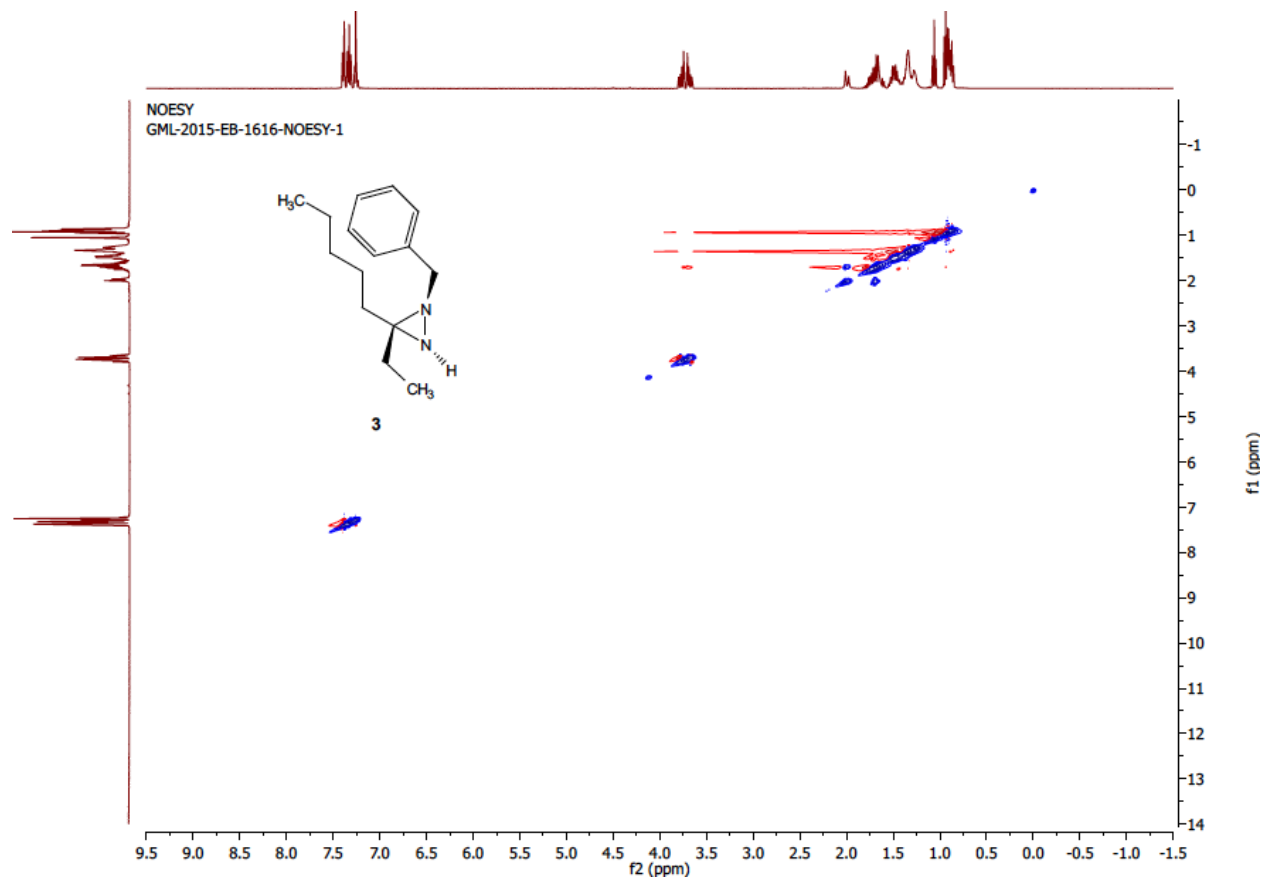

PROTON  
SZS-2015-HI-8888

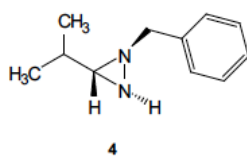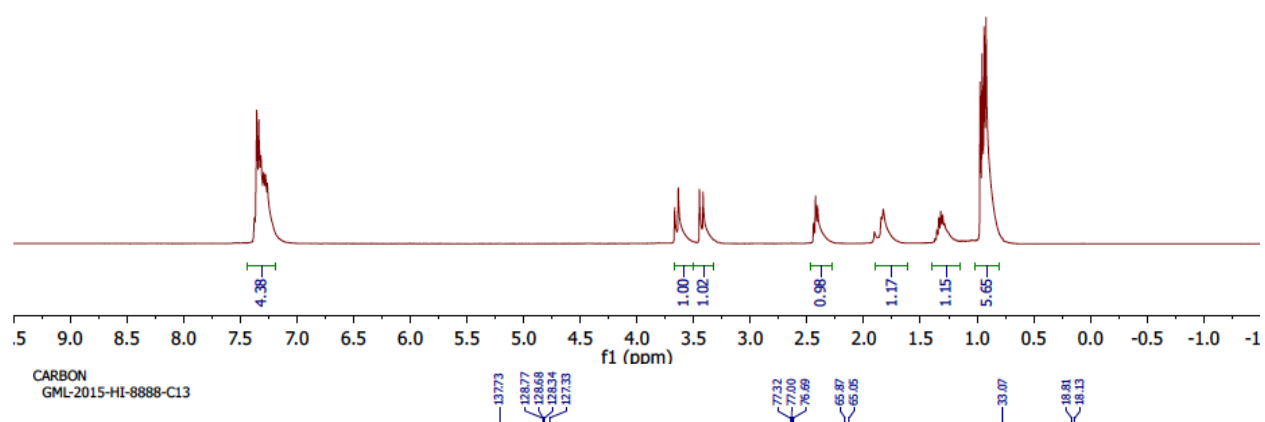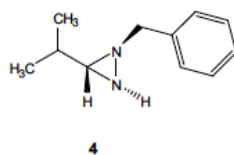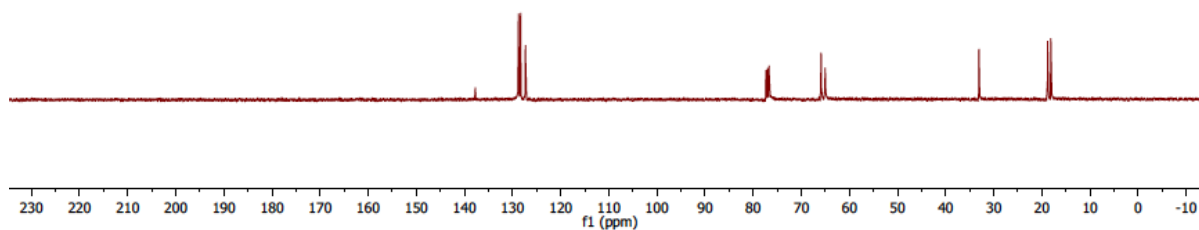

PROTON  
GML-2015-AB-4-4

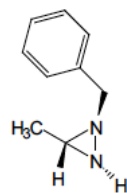

5

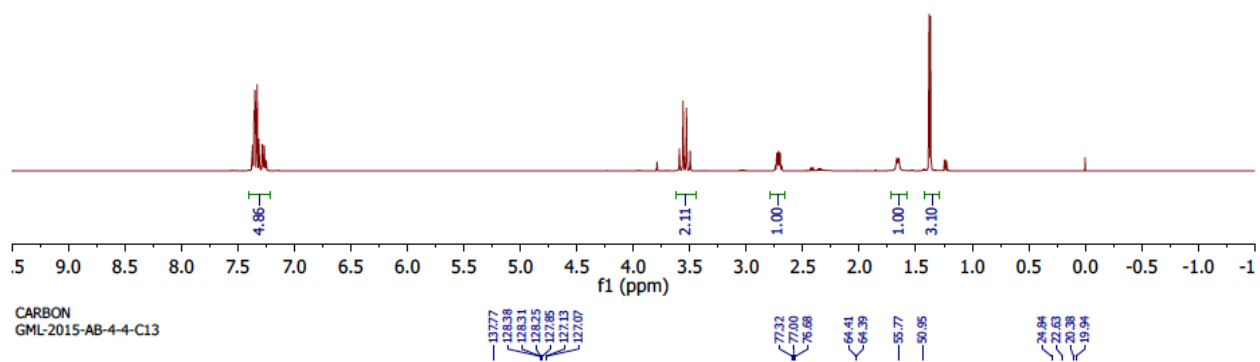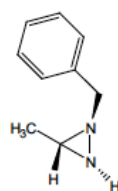

5

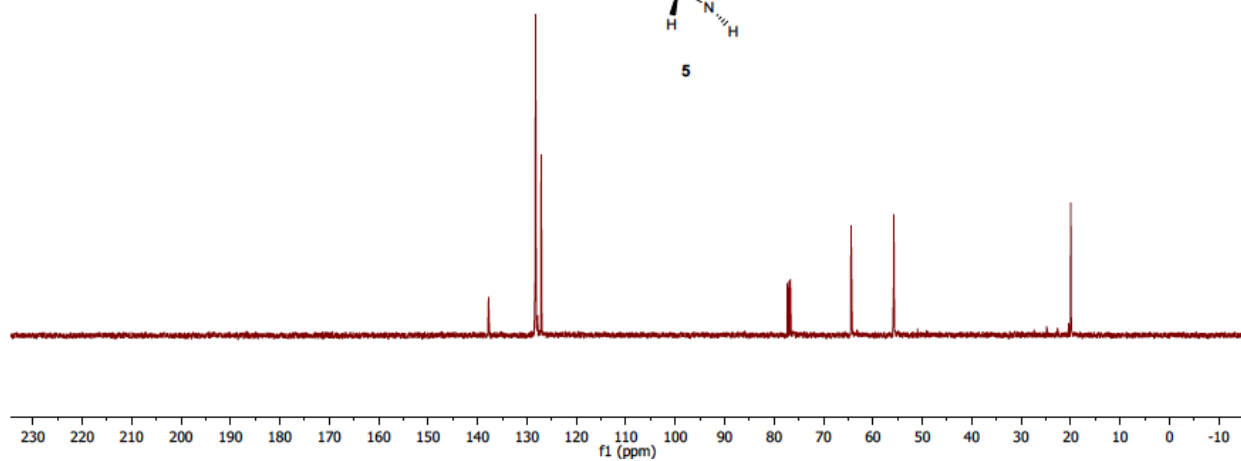

PROTON  
GML-2015-BB-2-2

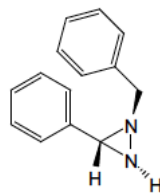

6

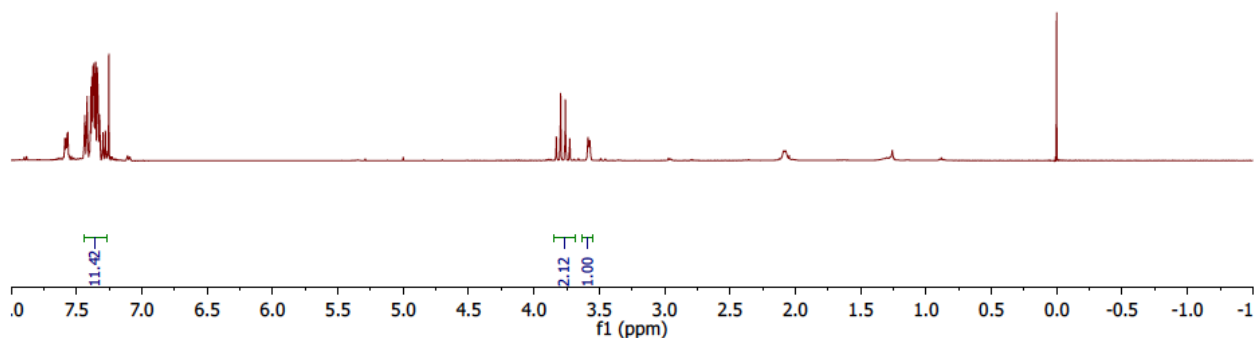

CARBON  
GML-2015-BB-2-2-C13

150.24  
150.22  
137.63  
137.49  
132.13  
129.91  
129.28  
128.88  
128.75  
128.72  
128.55  
128.50  
128.42  
128.36  
128.28  
77.32  
77.21  
77.01  
76.89  
64.72  
60.04

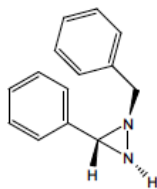

6

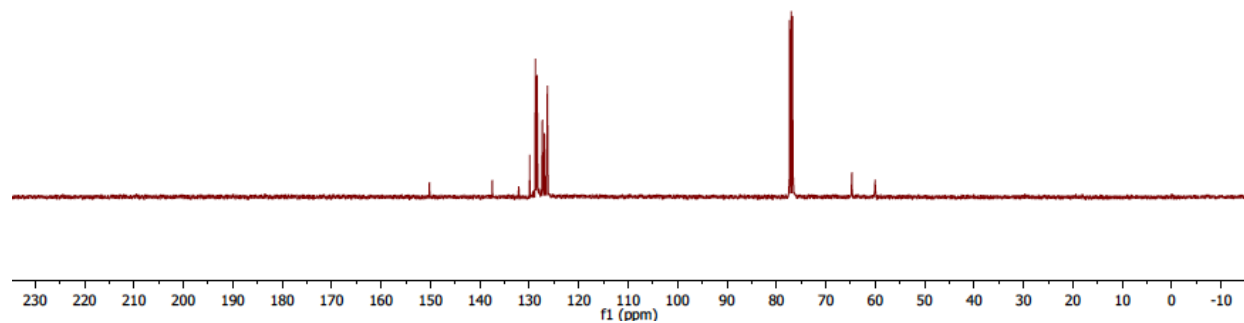



PROTON  
GML-2015-HO-2-2

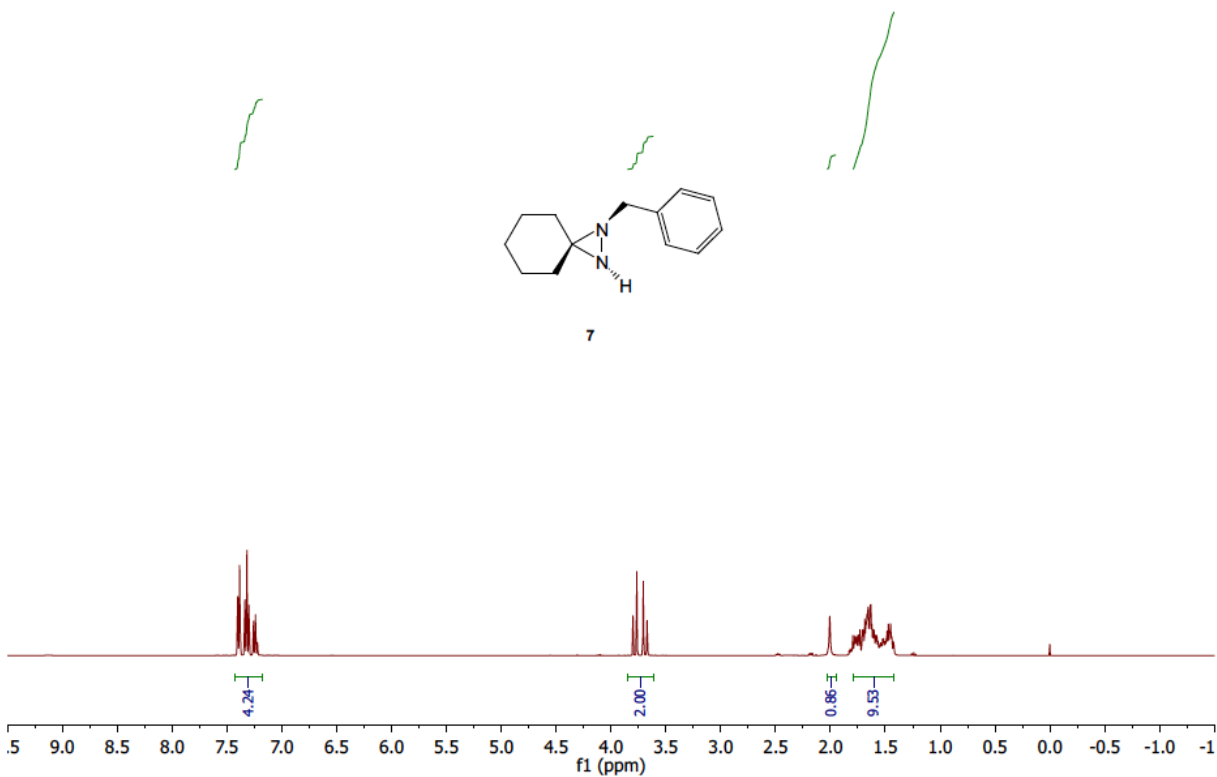

CARBON  
GML-2015-2-2-C13

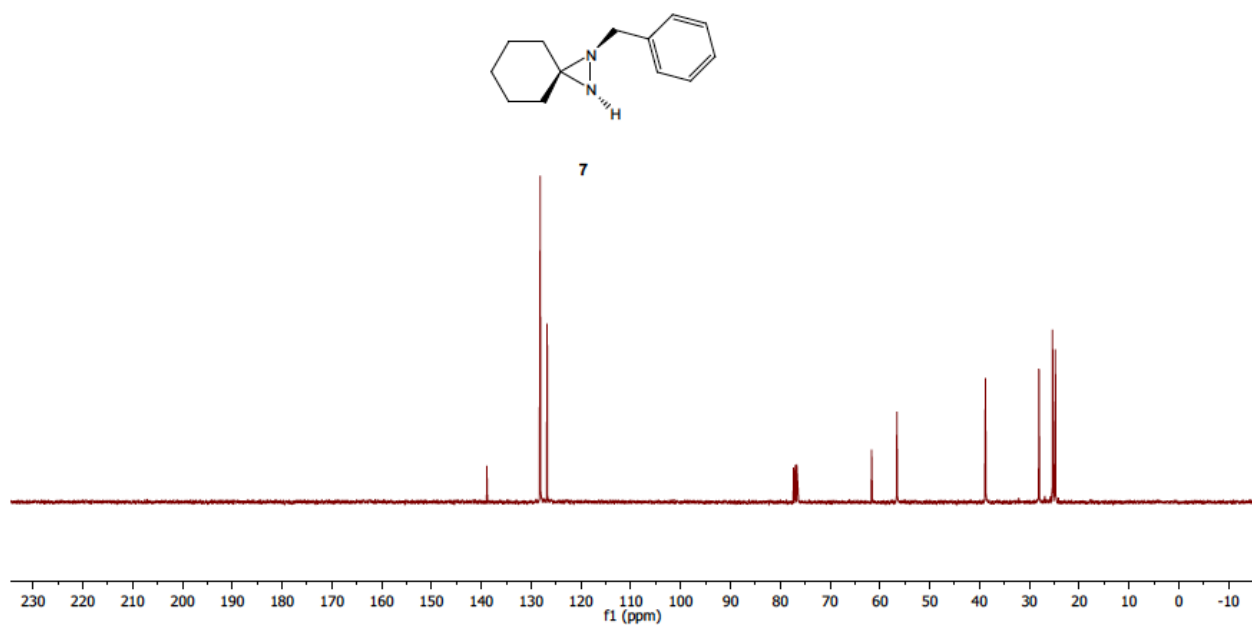

PROTON  
GML-2015-NBB-2-2

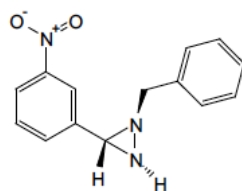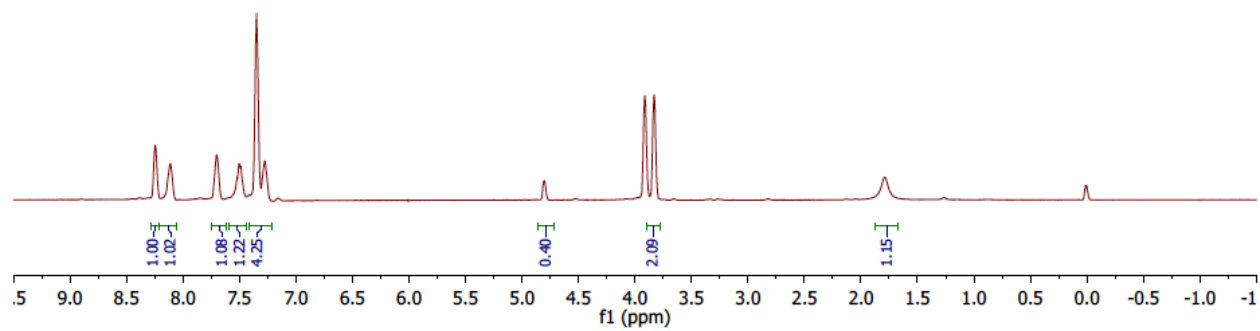

CARBON  
GML-2015-NBB-2-2-C13

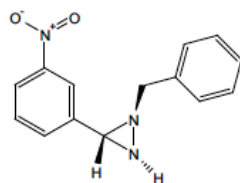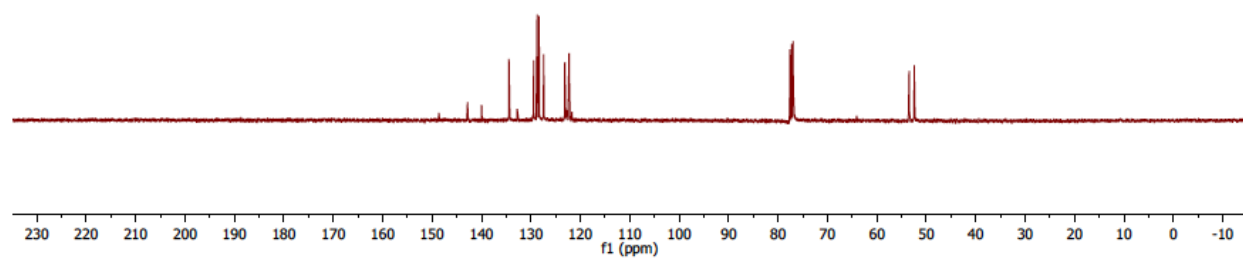

PROTON  
GML-2015-OHBB-88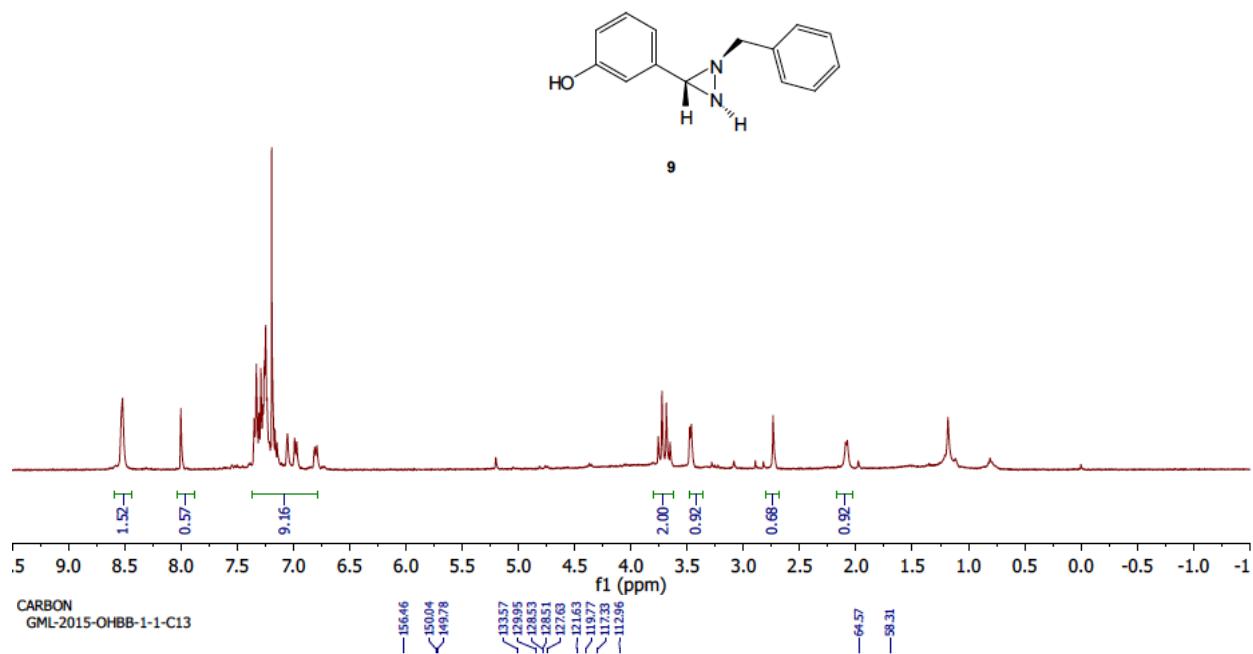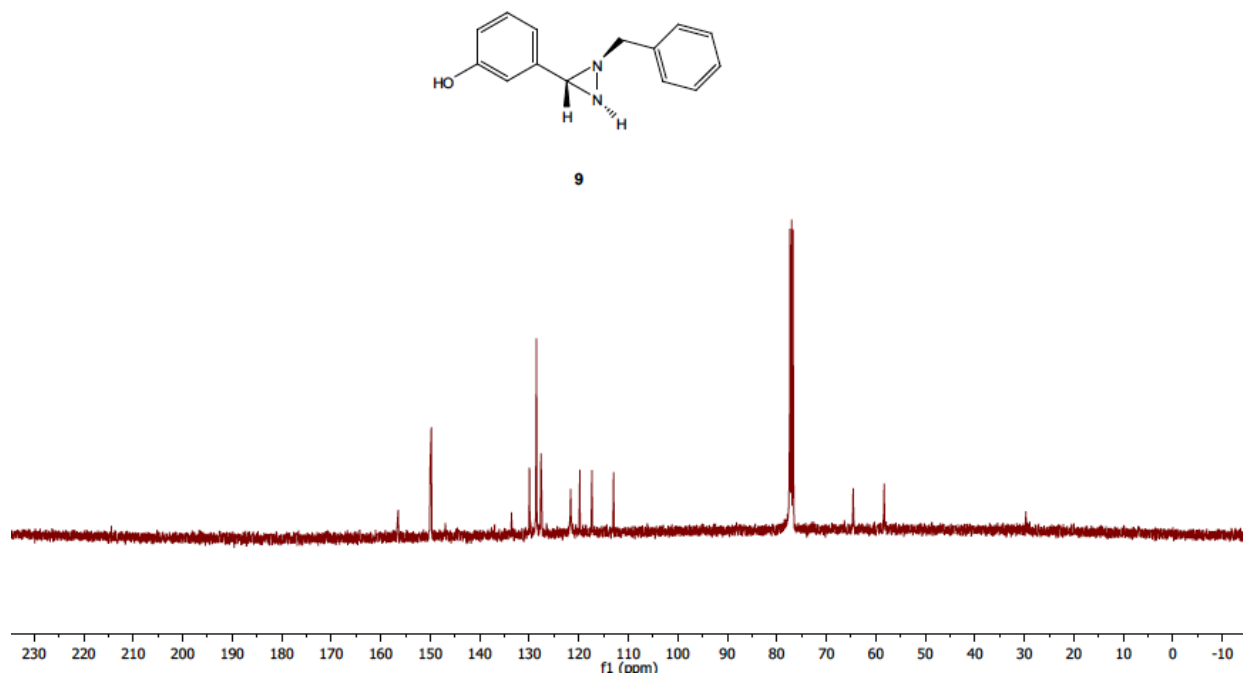

PROTON  
GML-2015-PBB-1-1

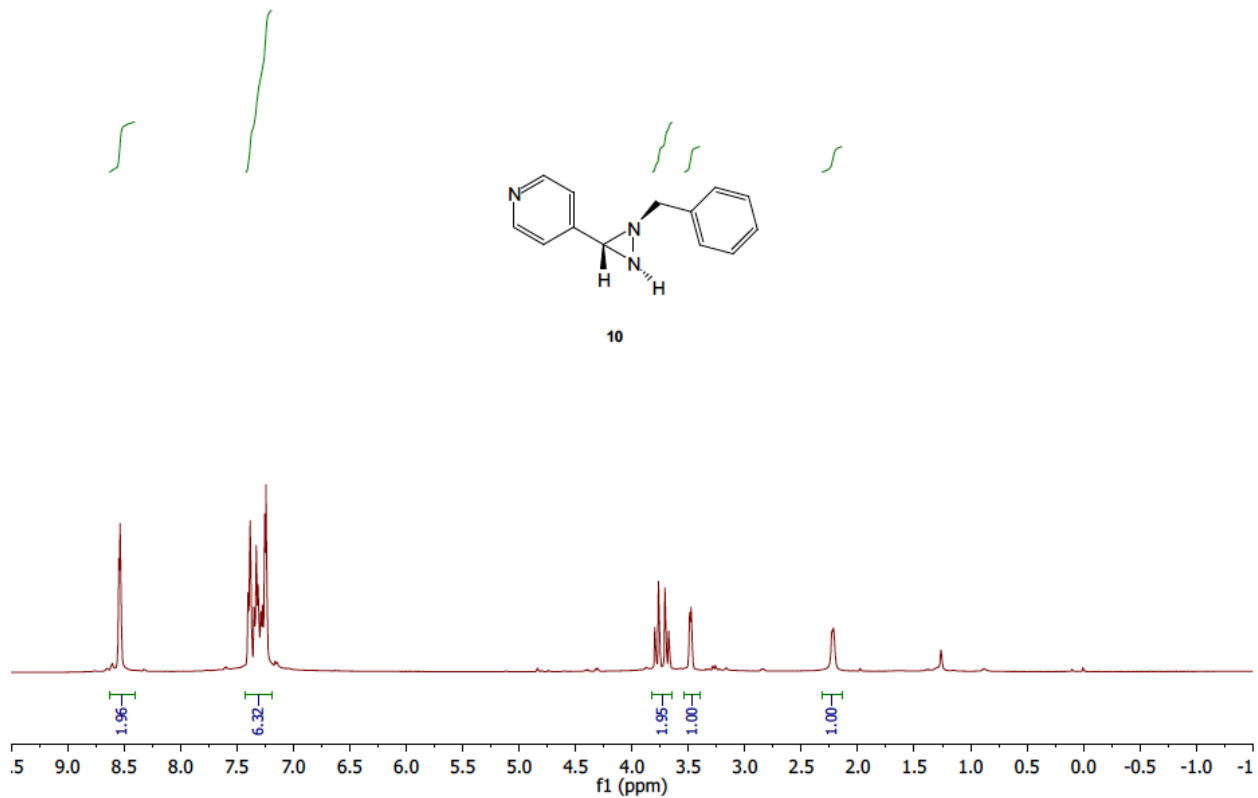

CARBON  
GML-2015-PBB-1-1

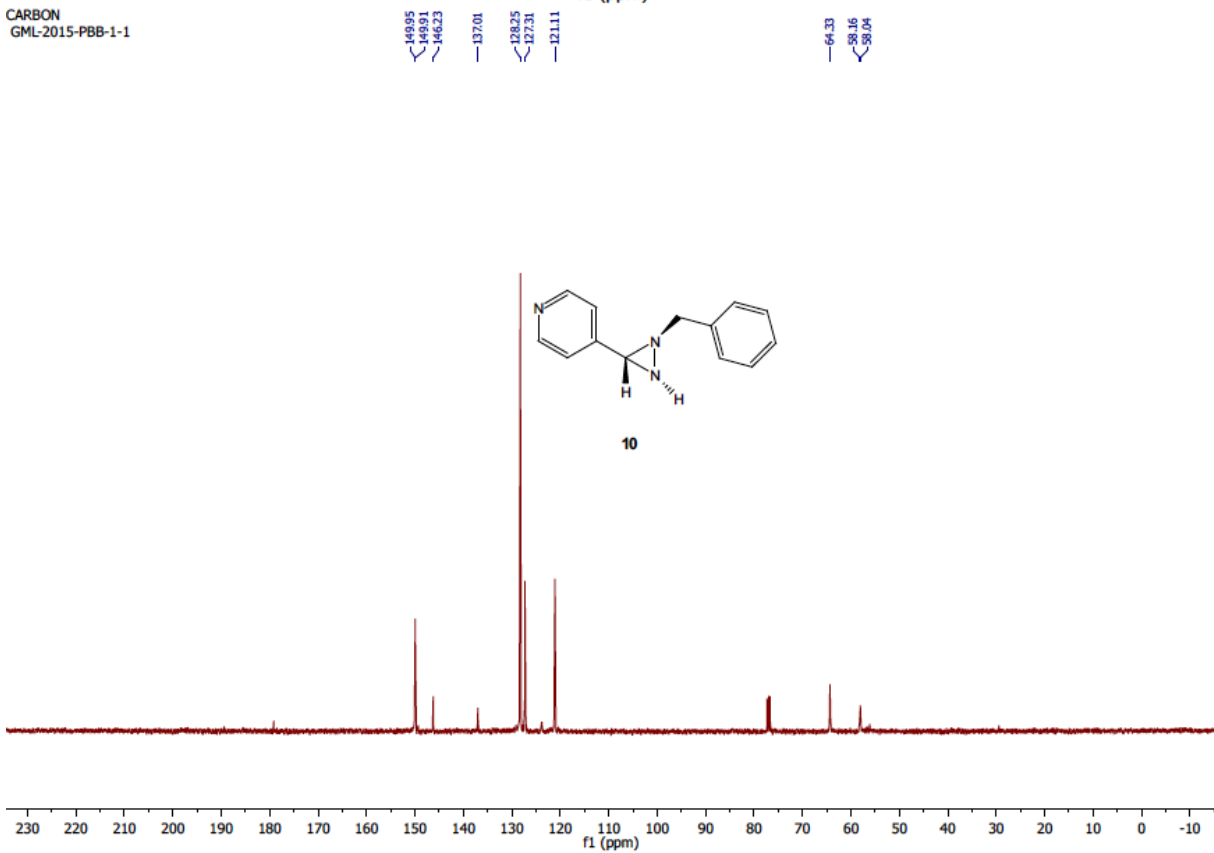

PROTON  
HT-2014-2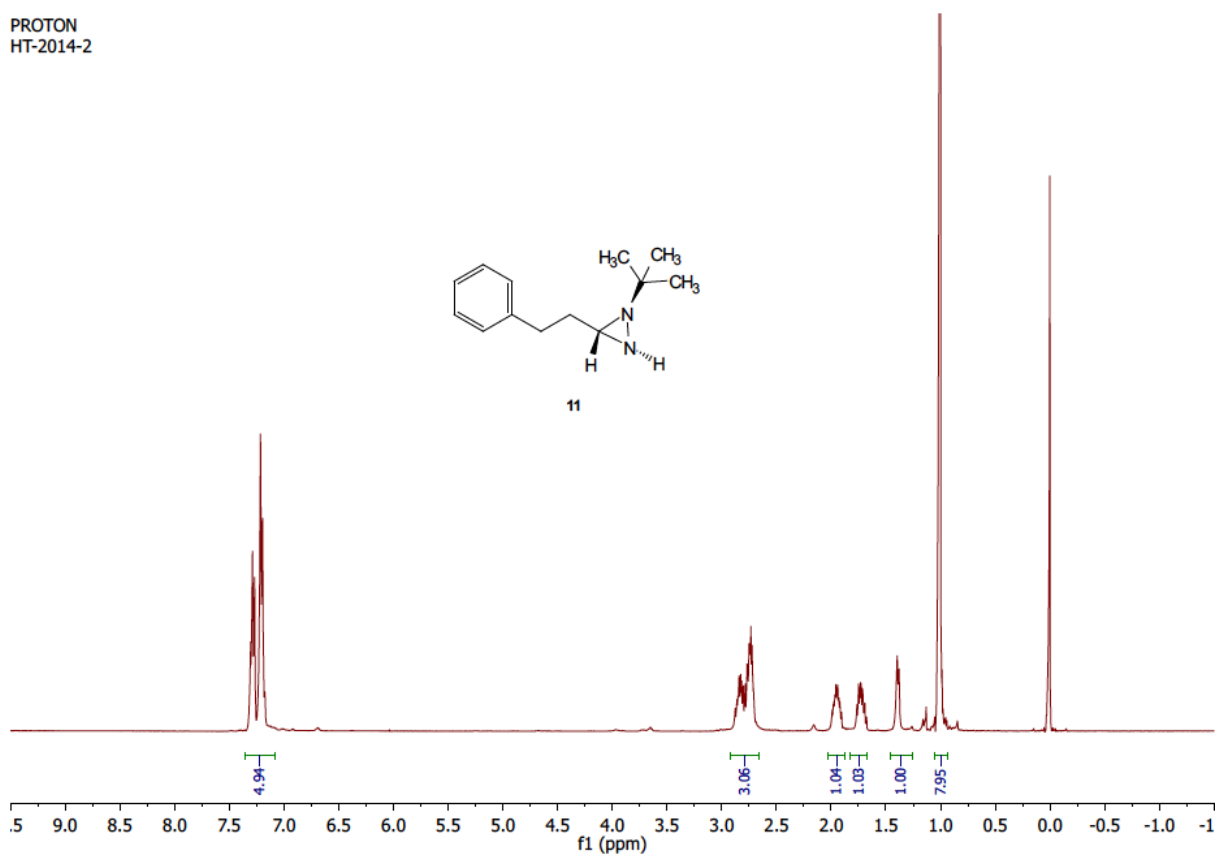CARBON  
HT-2014-C13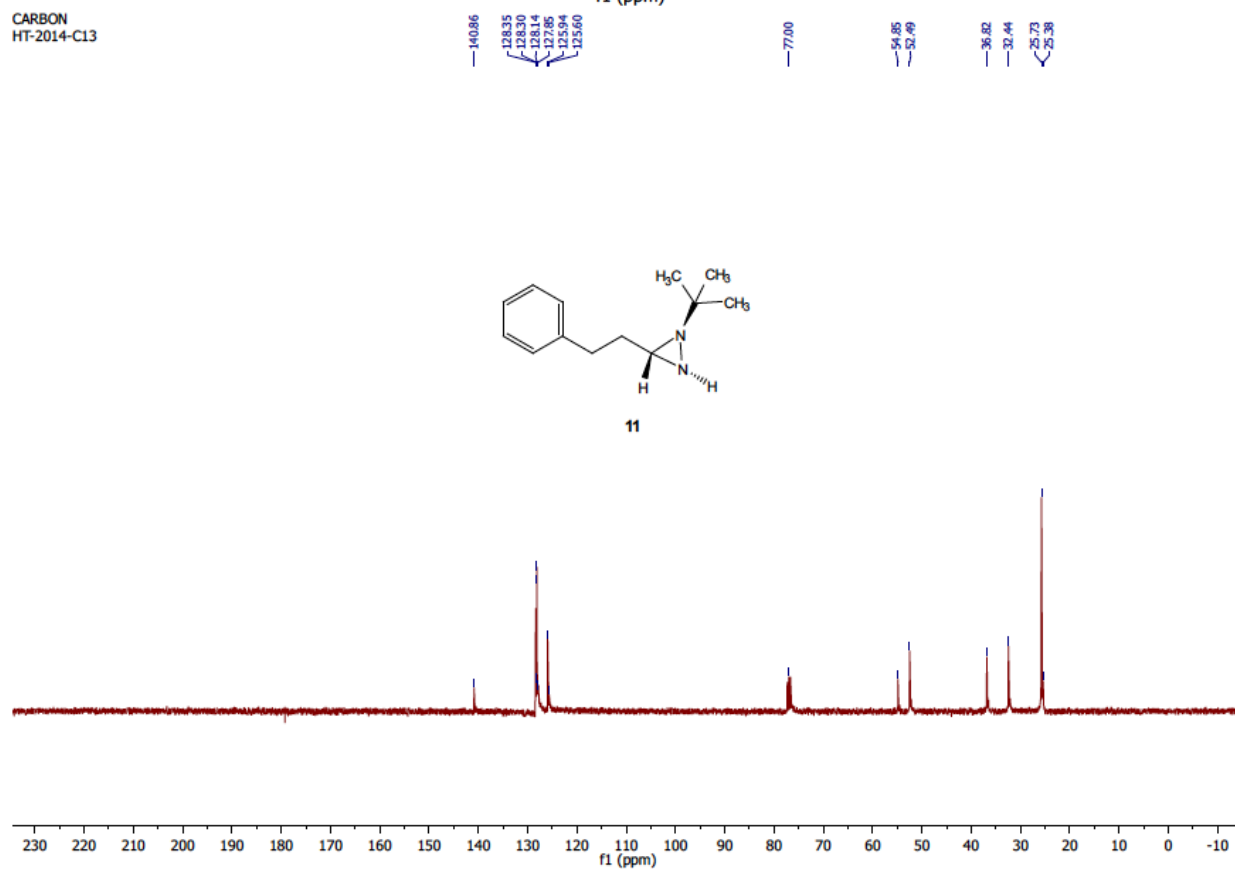

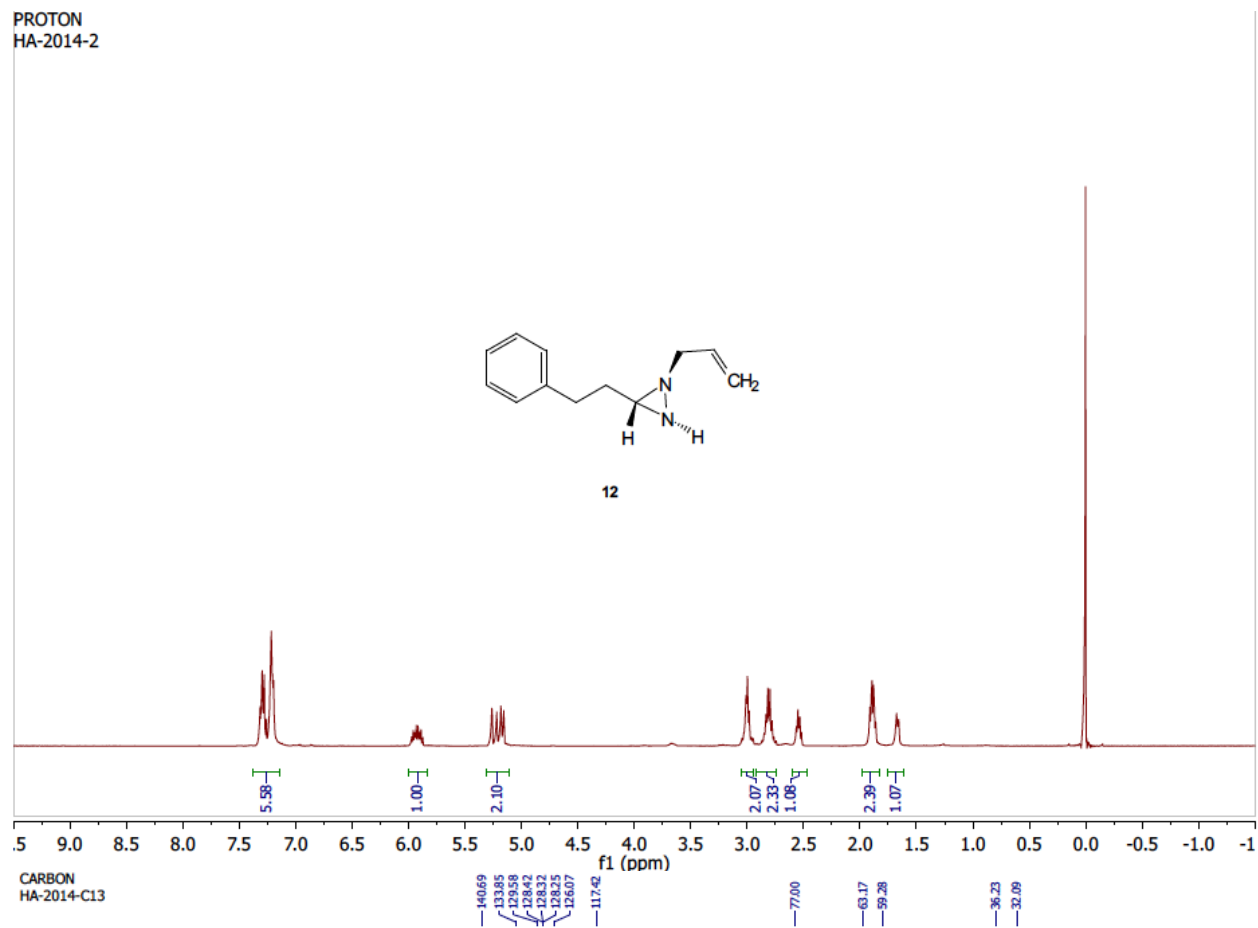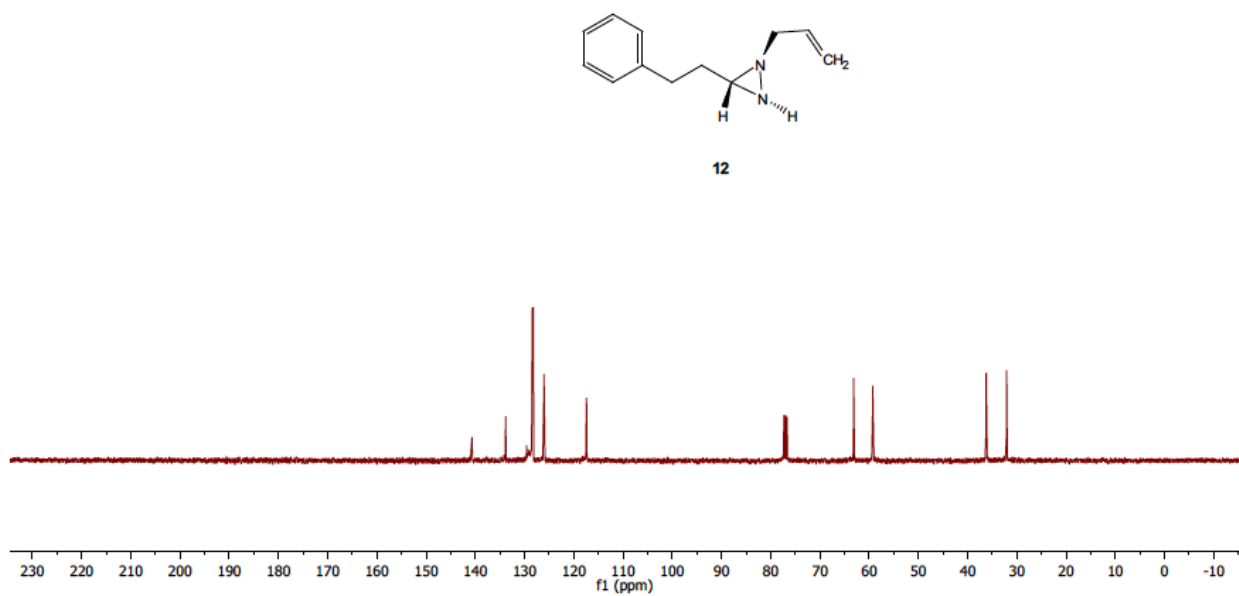

PROTON  
HC-2014-2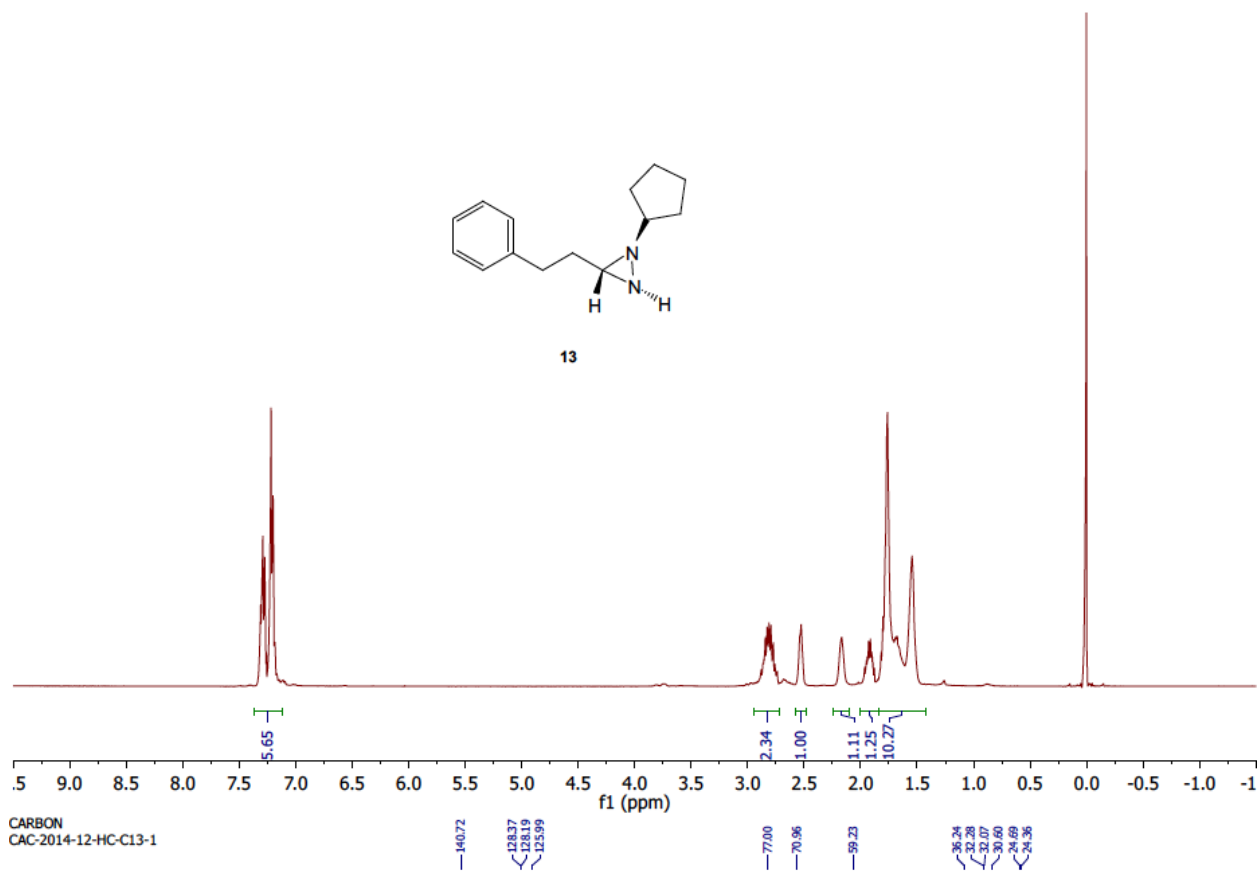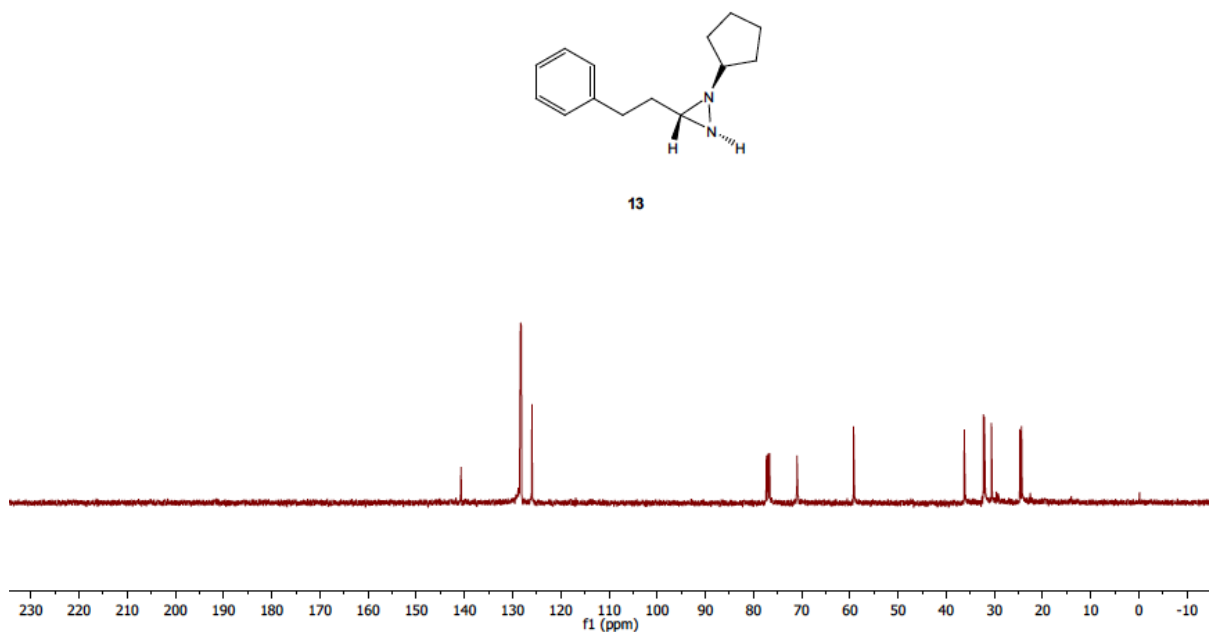

PROTON  
AWB-2014-44-HI-1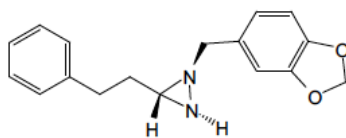

14

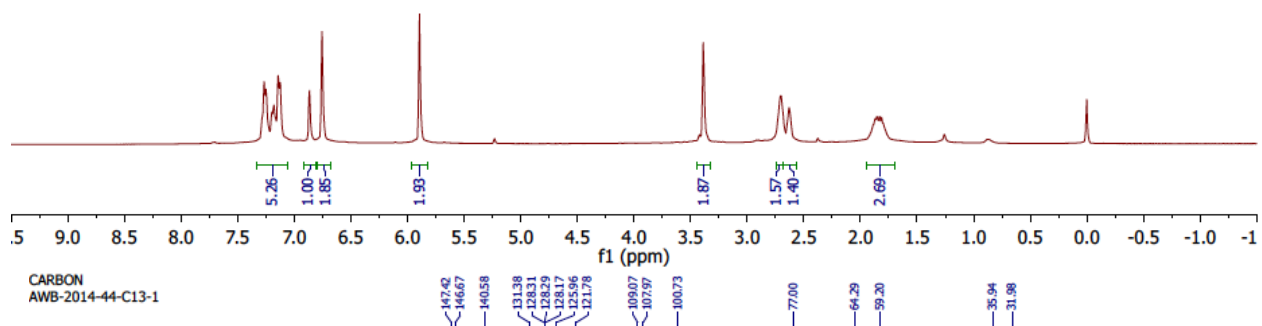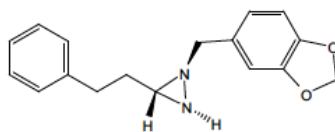

14

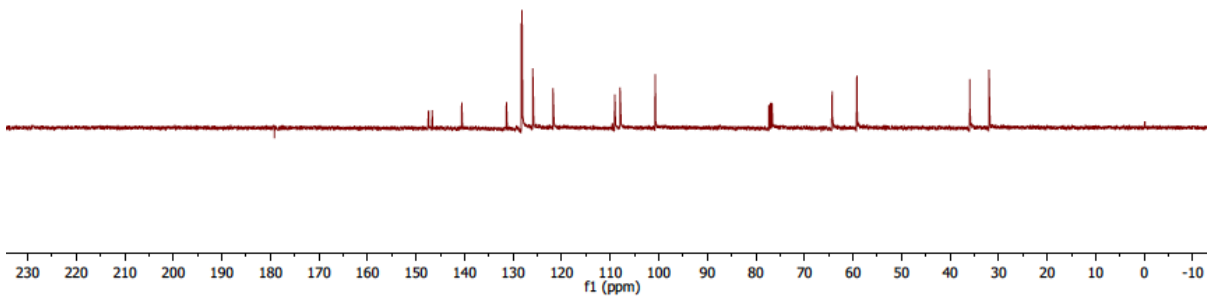



PROTON  
GML-2015-HPR-2-2-1

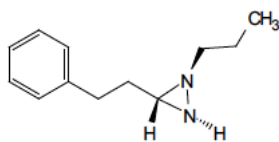

15

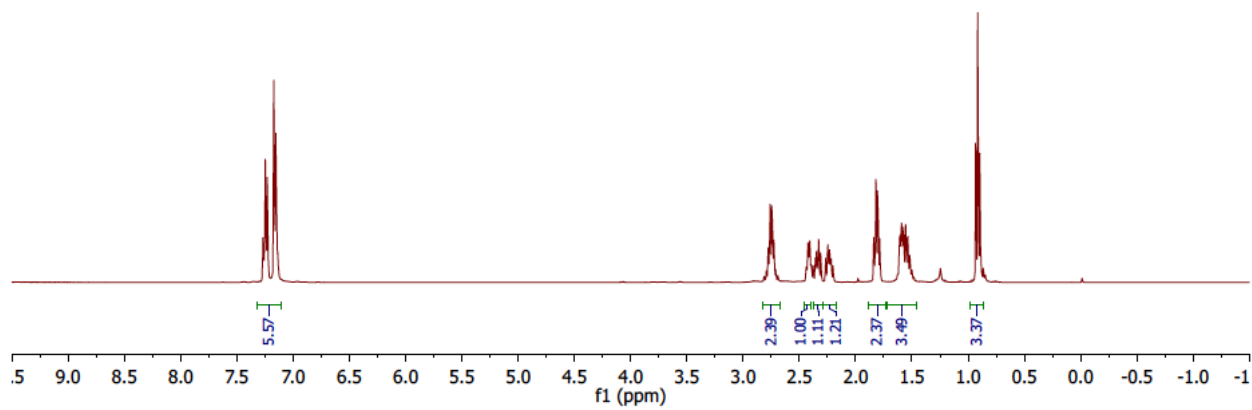

CARBON  
GML-2015-HPR-2-2-13

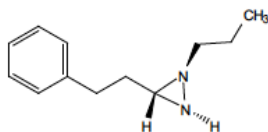

15

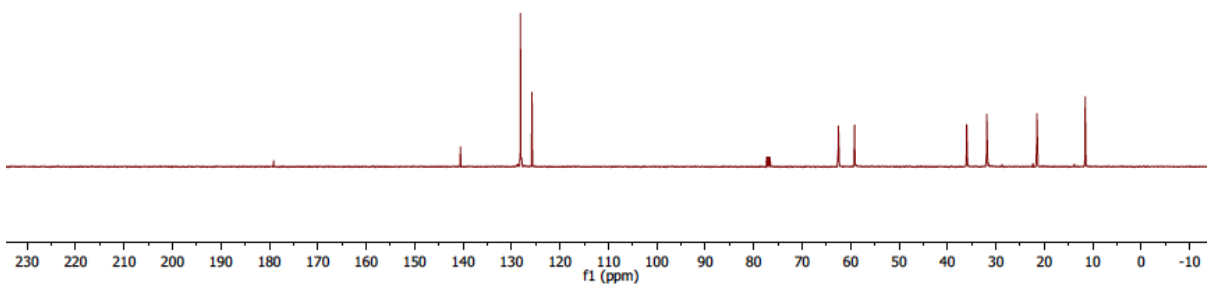

**E. UPLC TRACES:**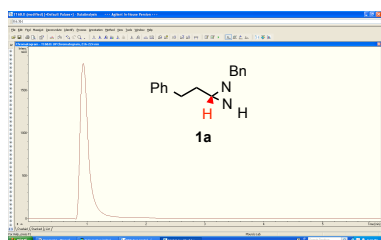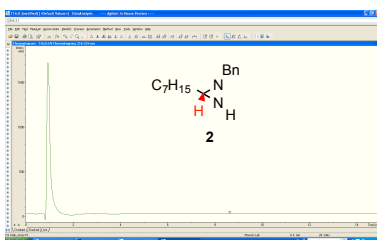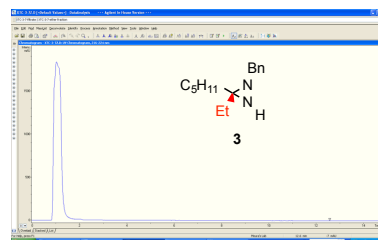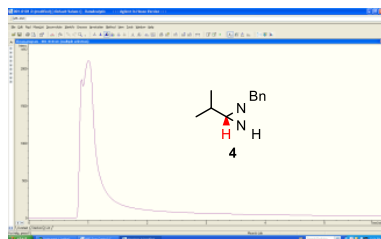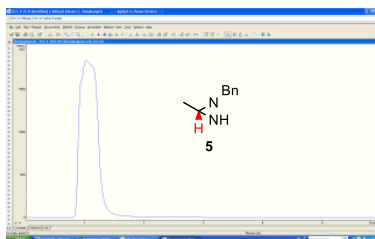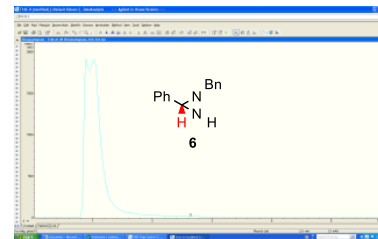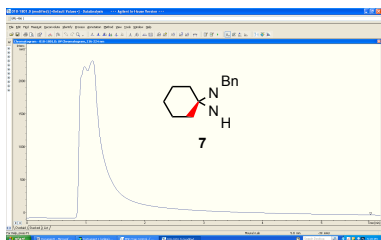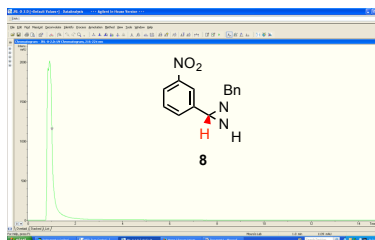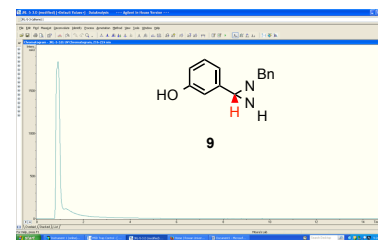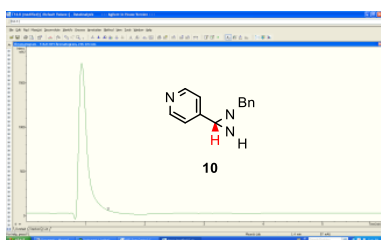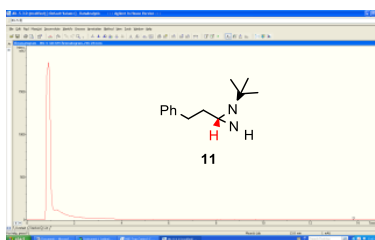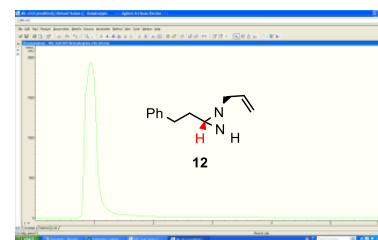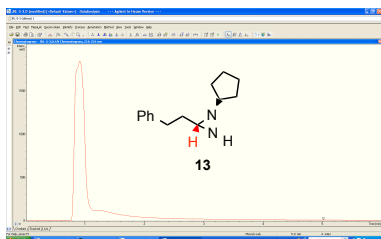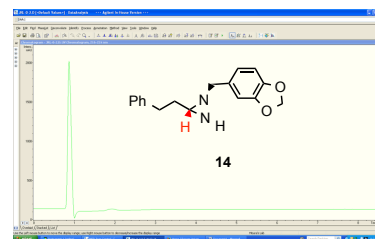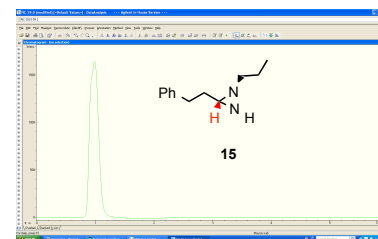

Supplement: c5cc04813c1.pdf [file c5cc04813c1.pdf]
